# Supplementary material
Source: publisher figshare collection journal article supplement (https://asha.figshare.com/articles/dataset/_/25395499)
Supplement: Supplementary file 1 [file 1]

**Supplemental Material S1.** Sources and descriptions for the pictures used in the study.

**Sources for the Pictures**

| Title         | Source                                                                                                                                                         |
|---------------|----------------------------------------------------------------------------------------------------------------------------------------------------------------|
| <b>Set A</b>  |                                                                                                                                                                |
| 1. BBQ        | Schubi Lernmedien AG. (2002). <i>Erzähl mal!</i> [Tell me!] Schaffhausen, Switzerland: Author.                                                                 |
| 2. Cat*       | Bank Street College of Education. (1968b). <i>The cat in the tree</i> . New York, NY: MacMillan.                                                               |
| 3. Beach      | Schubi Lernmedien AG. (2006). <i>Und dann...?</i> [And then...?] Schaffhausen, Switzerland: Author.                                                            |
| 4. Accident   | Hammill, D., & Larsen, S. (2009). <i>Test of Written Language - Fourth Edition (TOWL-4)</i> . Austin, TX: Pro-Ed.                                              |
| 5. Park       | Kangshuan Education Group. (2001). <i>Exercise book for life science – Elementary school</i> . Taipei, Taiwan: Author.                                         |
| 6. Sandbox*   | Bank Street College of Education. (1968a). <i>Give me my pail!</i> New York, NY: MacMillan.                                                                    |
| 7. Fan        | Kangshuan Education Group. (2001). <i>Exercise book for life science – Elementary school</i> . Taipei, Taiwan: Author.                                         |
| 8. Worker     | Schubi Lernmedien AG. (2002). <i>Erzähl mal!</i> [Tell me!] Schaffhausen, Switzerland: Author.                                                                 |
| <b>Set B</b>  |                                                                                                                                                                |
| 9. Breakfast* | coloring book for children - no publication information (Picture from Eisenberg et al., 2012)                                                                  |
| 10. School    | Kangshuan Education Group. (2001). <i>Exercise book for life science – Elementary school</i> . Taipei, Taiwan: Author.                                         |
| 11. Rain      | Van Gerven, S. (No date).<br><a href="https://www.pinterest.com/pin/221731981637446631/?lp=true">https://www.pinterest.com/pin/221731981637446631/?lp=true</a> |
| Title         | Source                                                                                                                                                         |

|                 |                                                                                                                                                                      |
|-----------------|----------------------------------------------------------------------------------------------------------------------------------------------------------------------|
| 12. Paint       | Schubi Lernmedien AG. (2006). <i>Und dann...? [And then...?]</i> Schaffhausen, Switzerland: Author.                                                                  |
| 13. Cookie*     | Goodglass H., Kaplan E., & Barresi B. (2001). <i>Boston Diagnostic Aphasia Examination—Third Edition (BDAE-3)</i> . Philadelphia, PA: Lippincott Williams & Wilkins. |
| 14. Living Room | Schubi Lernmedien AG. (2002). <i>Erzähl mal! [Tell me!]</i> Schaffhausen, Switzerland: Author.                                                                       |
| 15. Slide       | Kangshuan Education Group. (2001). <i>Exercise book for life science – Elementary school</i> . Taipei, Taiwan: Author.                                               |
| 16. Fire        | Schubi Lernmedien AG. (2006). <i>Und dann...? [And then...?]</i> Schaffhausen, Switzerland: Author.                                                                  |

Note: The symbol “\*” denotes the pictures that were also used in Eisenberg et al. (2012).

### Description for the pictures

| Title        | Description                                                                                                                                                                                                                                                                                                                                 |
|--------------|---------------------------------------------------------------------------------------------------------------------------------------------------------------------------------------------------------------------------------------------------------------------------------------------------------------------------------------------|
| <b>Set A</b> |                                                                                                                                                                                                                                                                                                                                             |
| 1. BBQ       | A dad mowing the lawn in the backyard; a mom making BBQ; two children playing in an inflatable swimming pool; a dog drinking water from a bowl by a faucet with a hose                                                                                                                                                                      |
| 2. Cat       | A cat stuck in a tree on the side of the road; two children looking at the tree and trying to figure out how to get the cat down                                                                                                                                                                                                            |
| 3. Beach     | A dad inflating a raft with a foot pump; a girl blowing up an innertube; a boy picking up shells and putting them into a bucket; a beach ball and an umbrella lying in the sand                                                                                                                                                             |
| 4. Accident  | A smashed car that says “Student Driver” up against a fire hydrant on the side of the road; a fire hydrant squirting water out the top; a police officer holding a clipboard and taking notes; a woman holding a “driver’s ed” paper pointing to a dog; a dog sitting in the grass; a student driver arguing with a man holding a dog leash |
| 5. Park      | Kids looking through the grass and the bushes; lots of butterflies flying around the flowers; grasshoppers and a bird sitting on the rocks; a mother and her baby bunnies sitting inside a burrow                                                                                                                                           |
| 6. Sandbox   | Two boys sitting in a sandbox fighting over a bucket; a mom running towards the boys with her arms out; two shovels and a bucket sitting in the sand; a toy car on the ground outside of the sandbox                                                                                                                                        |

7. Fan                      An unsupervised baby with a binky reaching for a fan; a man in the bathroom trying to plug in a blow dryer while standing in a puddle of water; a tea kettle in the kitchen is on fire

8. Worker                Two construction workers with shovels standing in a pit looking scared, water squirting out of the corner of the pit; a pile of dirt next to a wagon; construction signs in the road

**Set B**

9. Breakfast            A dad taking a piece of toast out of the toaster; a little girl yawning and holding a teddy bear; a mom pouring juice; an older girl setting the table; a box of cereal and bowls on the table

10. School              A crossing guard waving two red flags; three children crossing the street; two little girls standing by a street sign and laughing; a boy and a girl walking down the sidewalk

11. Rain                A boy standing on the sidewalk wearing a raincoat and holding an umbrella, a girl in the upstairs window looking sad, a mom pedaling a bicycle with her daughter in the back, a man walking a dog; a car splashing water at a man and woman crossing the street; leaves falling off a tree

12. Paint                A girl sitting by a white tarp with a butterfly painted on it; a cat stepping on the tarp with paint-covered feet and leaving prints; an open set of paints sitting on the floor; a glass of water with a paint brush in it sitting in the corner of the tarp

13. Cookie              A mom washing dishes while the sink is overflows onto the floor; a boy and a girl trying to sneak cookies from the jar in the cupboard; a boy standing on a stool to reach the cookies as the stool tips over

14. Living Room        Two boys having a pillow fight; feathers flying everywhere; a lamp tipping over; a bowl of snacks dumped on the ground; a half-finished bottle of soda on the ground

15. Slide                A girl going down the slide and smiling; a boy waiting at the top of the slide; a boy climbing up the ladder to the slide, a boy walking across a bridge to get to the slide; a girl yelling to her friend on the slide; a woman standing by the slide with her arms out; three kids playing on the lawn

16. Fire                 An older girl dialing on the phone and a younger boy watching; smoke coming out of the window on the top floor of an apartment across the street

---
