# Supplementary material
Source: publisher figshare collection journal article supplement (https://asha.figshare.com/articles/dataset/_/25395499)
Supplement: Supplementary file 2 [file 1]

## **Supplemental Material S2. Elicited questions, prompts, and story starters.**

### **Elicited Questions and Prompts**

1. Elicited Question: 怎麼了? 發生了什麼事? 先說一件事就好. (English: What's going on? What's happening? Talk about one thing first.)

Prompt: 告訴我這裡發生什麼事了? 先說一件事就好. (English: Tell me what's happening here. Talk about one thing first.)

2. Elicited Question: 再說一件事. (English: Talk about one more thing.)

Prompt: 還有呢? 再說一件事. (English: What else? Talk about one more thing.)

3. Elicited Question: 現在換我先說, 我說完以後, 就換你說, 你看喔, (起始句), 然後呢? (English: Now I'm going to talk about the story. After I am done, it will be your turn to talk about the story. Look, STORY STARTER. And then?)

Prompt: 我再說一次喔, 我說完以後, 就換你說, (起始句), 然後發生了什麼事了呢? (English: I will talk about the story one more time. After I finish, you will tell the story.. STORY STARTER. And then what happens?)

4. Elicited Question: 最後, 你再說一件事. (English: Last, you talk about one more thing.)

Prompt: 還有什麼是剛剛沒有說到的? 再多說一件事. (English: Is there anything else that you did not talk about? Tell me one more thing.)

### **Story Starters for Elicited Question 3 by Picture**

1. BBQ: 媽媽在烤肉. (English: Mom is making barbecue.)

2. Cat: 貓咪卡在樹上下不來. (English: The cat is stuck in the tree.)

3. Beach: 爸爸帶哥哥和妹妹來海邊玩. (English: Dad takes Brother and Sister to the beach to play.)

4. Accident: 車子撞到消防栓. (English: The car hit the fire hydrant.)

5. Park: 小朋友在公園玩. (English: The children are playing in the park.)

6. Sandbox: 孩子們在搶玩具. (English: The kids are fighting for the toy.)

7. Fan: 哥哥洗完頭. (English: Brother finished washing his hair.)

8. Worker: 工人們正在修馬路. (English: The workers are repairing the street.)
9. Breakfast: 妹妹剛睡醒. (English: Sister just woke up.)
10. School: 星期一大家去學校上課. (English: Everyone is going to school on Monday.)
11. Rain: 媽媽騎腳踏車載妹妹回家. (English: Mom is taking Sister home by bicycle.)
12. Paint: 妹妹在家裡畫畫. (English: Sister is painting at home)
13. Cookie: 弟弟想要拿餅乾. (English: Brother wants to get the cookies.)
14. Living Room: 弟弟和妹妹在客廳玩. (English: Brother and Sister are playing in the living room.)
15. Slide: 小美溜下溜滑梯. (English: May is going down the slide.)
16. Fire: 鄰居家失火了. (English: The neighbor's home is on fire.)
