# Supplementary material
Source: publisher figshare collection journal article supplement (https://asha.figshare.com/articles/dataset/_/25395499)
Supplement: Supplementary file 3 [file 1]

### Supplemental Material S3. Error types and examples for potential errors.

| Error Types/Potential Errors         | Examples <sup>a</sup>                                                                                                                                                                         |
|--------------------------------------|-----------------------------------------------------------------------------------------------------------------------------------------------------------------------------------------------|
| <i>Argument Structure</i>            |                                                                                                                                                                                               |
| Omission of subject arguments        | Error: ____ zài hé lǐ yóuyóǒng. (在河裡游泳)<br>Target: <b>tā</b> zài hé lǐ yóuyóǒng. (他在河裡游泳)<br>‘He is swimming in the river.’                                                                   |
| Omission of object arguments         | Error: chēzi zhuàng dào le _____. (車子撞到了)<br>Target: chēzi zhuàng dào le <b>nà kē shù</b> (車子撞到了那棵樹)<br>‘The car hit the tree.’                                                               |
| <i>Temporal Referencing</i>          |                                                                                                                                                                                               |
| Lack of temporal referencing devices | Error: tā zhāi huā. (他摘花)<br>Target: tā <b>zài</b> zhāi huā. (他在摘花)<br>‘He is picking flowers’<br>Target <sup>c</sup> : tā zhāi <b>wán huā le</b> . (他摘完花了)<br>‘He finished picking flowers.’ |
| Misuse of aspect markers             | Error: tā <b>zài</b> chuān zhe wàitào. (他在穿著外套)<br>Target: tā chuān zhe wàitào. (他穿著外套)<br>‘He is wearing a coat.’                                                                            |
| Misuse of auxiliary verbs            | Error: tā <b>yào</b> zài wán bīngxiāng. (他要在玩冰箱)<br>Target: tā zài wán bīngxiāng. (他在玩冰箱)<br>‘He is playing with the refrigerator.’                                                           |
| <i>Grammatical Morpheme</i>          |                                                                                                                                                                                               |
| Misuse of classifiers                | Error: yǒu yī ? <b>ge</b> shù (有一個樹)<br>Target <sup>b</sup> : yǒu yī <b>kē</b> shù (有一棵樹)<br>‘There is a tree’                                                                                |
| Omission of prepositions             | Error: xiǎomāo tiào ____ tā shēnshàng. (小貓跳她身上)<br>Target: xiǎomāo tiào <b>dào</b> tā shēnshàng. (小貓跳到她身上)<br>‘The cat jumped onto him’                                                       |
| Omission of possessive marker -de    | Error: nà shì lǎoshī ____ shuǐtǒng. (那是老師桶子)<br>Target: nà shì lǎoshī <b>de</b> shuǐtǒng. (那是老師的桶子)<br>‘That’s the teacher’s pale’                                                            |

| Error Types/Potential Errors                | Examples                                                                                                                                                                                                                                                                                                                                               |
|---------------------------------------------|--------------------------------------------------------------------------------------------------------------------------------------------------------------------------------------------------------------------------------------------------------------------------------------------------------------------------------------------------------|
| <i>Sentence Structure</i>                   |                                                                                                                                                                                                                                                                                                                                                        |
| Word order errors                           | Error: dǎo le yǐzi. (倒了椅子)<br>Target: yǐzi dǎo le. (椅子倒了)<br>‘The chair fell over.’                                                                                                                                                                                                                                                                    |
| Omission of sentence elements               | Error: tā zài ____ chūifēngjī. (他在吹風機)<br>Target: tā zài <b>yòng</b> chūifēngjī. (他在 <b>用</b> 吹風機)<br>‘He is using the hairdryer.’<br><br>Error: shù yè diào dào chē zi _____. (樹葉掉到車子)<br>Target: shù yè diào dào chē zi <b>shàng</b> . (樹葉掉到車子上)<br>‘The leaves fell onto the car.’                                                                  |
| Inappropriate addition of sentence elements | Error: māo mī kǎ <b>?zhù</b> zài shù shàng. (貓咪卡 <b>住</b> 在樹上)<br>Target: māo mī kǎ zài shù shàng. (貓咪卡在樹上)<br>‘The cat was stuck in the tree.’                                                                                                                                                                                                        |
| Misuse of sentence elements                 | Error: shuǐ pēn <b>?qǐ lái</b> le. (水噴 <b>起</b> 來了)<br>Target: shuǐ pēn chū lái le. (水噴 <b>出</b> 來了)<br>‘The water sprayed out.’                                                                                                                                                                                                                       |
| <i>Fragment</i>                             | Examiner - zài shuō yí jiàn shì. (再說一件事)<br>‘Talk about one more thing.’<br>Child – yí ge hěn dà de dàn gāo (一個很大的蛋糕)<br>‘A very big cake.’                                                                                                                                                                                                            |
| <i>Other</i>                                | Error: tā zài <b>shī gōng</b> mǎ lù. (他在 <b>施工</b> 馬路)<br>Target: tā zài <b>xiū lǐ</b> mǎ lù. (他在 <b>修理</b> 馬路)<br>‘He is repairing the road.’<br><br>Error: tā zài <b>xǐ shuǐ</b> . (他在 <b>洗水</b> ) <sup>d</sup><br>‘He is washing water.’<br><br>Error: jiě jie chuī dào yóu yǒng chí. (姊姊吹到游泳池) <sup>d</sup><br>‘Sister blew to the swimming pool.’ |

Note:

<sup>a</sup> The symbol “?” indicates misuse or inappropriate addition; the underline indicates omission

<sup>b</sup> The target is determined from the context.

<sup>c</sup> More than one target is provided because there are several possible ways to repair the incompleteness of the sentence.

<sup>d</sup> The target is not provided in this example because we are not able to determine what the child means.
